# Supplementary material for: Conformational changes in Lassa virus L protein associated with promoter binding and RNA synthesis activity
Source: PubMed Central journal article supplement (PMC8639829; doi:10.1038/s41467-021-27305-5), 2021-12-02
Supplement: 41467_2021_27305_MOESM4_ESM.pdf [file 41467_2021_27305_MOESM4_ESM.pdf]

**Supplementary Data 1. Alignment of full-length L protein sequences of Old World and  
New World arenaviruses**

**Conformational changes in Lassa virus L protein associated with promoter binding  
and RNA synthesis activity**

**Tomas Kouba<sup>1</sup>, Dominik Vogel<sup>2</sup>, Sigurdur R. Thorkelsson<sup>3</sup>, Emmanuelle R. J. Quemin<sup>3</sup>,  
Harry M. Williams<sup>2</sup>, Morlin Milewski<sup>2</sup>, Carola Busch<sup>2</sup>, Stephan Günther<sup>2</sup>, Kay  
Grünewald<sup>3</sup>, Maria Rosenthal<sup>2,\*</sup> and Stephen Cusack<sup>1,\*</sup>**

1- European Molecular Biology Laboratory, Grenoble, France

2- Bernhard Nocht Institute for Tropical Medicine, Hamburg, Germany

3- Centre for Structural Systems Biology, Leibniz Institute for Experimental Virology,  
University of Hamburg, Hamburg, Germany

These authors contributed equally: Tomas Kouba, Dominik Vogel, Sigurdur R. Thorkelsson

These authors jointly supervised this work: Maria Rosenthal and Stephen Cusack

\* To whom correspondence should be addressed: [rosenthal@bnitm.de](mailto:rosenthal@bnitm.de) and [cusack@embl.fr](mailto:cusack@embl.fr)

# Endonuclease

LASV\_Bantou-289(lin4)\_AZI95808

LASV\_Bantou-289(lin4)\_AZI95808  
 LASV\_Pinneo-NIG-1969(lin1)\_AIT17835  
 LASV\_Nig08-04(lin2)\_ADU56613  
 LASV\_Nig08-A18(lin3)\_ADU56617  
 LASV\_AV(lin5)\_AO59509  
 LASV\_KAK-428(lin6)\_ANH09760  
 LASV\_BEN/2016/3488(lin7)\_QNC69562  
 LASV\_G3278-SLE-2013\_AIT17397  
 MOVV\_Acar\_YP\_516229  
 LCMV\_Armstrongr\_ASD49942  
 JUNV\_XJ13\_ACO52427  
 TACV\_NP\_694848  
 OLVV\_3229\_YP\_001649214  
 GTOV\_S-26764\_ALE15099  
 MACV\_Carvalho\_AIG51560

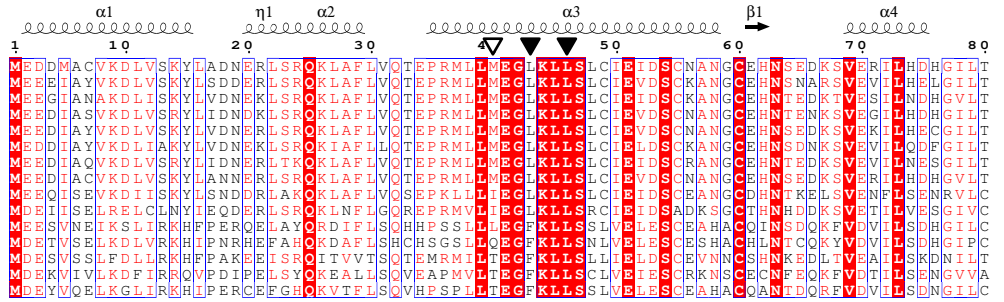

LASV\_Bantou-289(lin4)\_AZI95808

LASV\_Bantou-289(lin4)\_AZI95808  
 LASV\_Pinneo-NIG-1969(lin1)\_AIT17835  
 LASV\_Nig08-04(lin2)\_ADU56613  
 LASV\_Nig08-A18(lin3)\_ADU56617  
 LASV\_AV(lin5)\_AO59509  
 LASV\_KAK-428(lin6)\_ANH09760  
 LASV\_BEN/2016/3488(lin7)\_QNC69562  
 LASV\_G3278-SLE-2013\_AIT17397  
 MOVV\_Acar\_YP\_516229  
 LCMV\_Armstrongr\_ASD49942  
 JUNV\_XJ13\_ACO52427  
 TACV\_NP\_694848  
 OLVV\_3229\_YP\_001649214  
 GTOV\_S-26764\_ALE15099  
 MACV\_Carvalho\_AIG51560

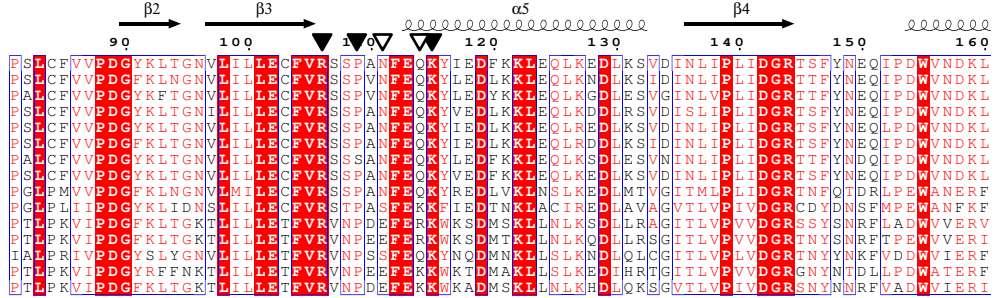

Linker

LASV\_Bantou-289(lin4)\_AZI95808

LASV\_Bantou-289(lin4)\_AZI95808  
 LASV\_Pinneo-NIG-1969(lin1)\_AIT17835  
 LASV\_Nig08-04(lin2)\_ADU56613  
 LASV\_Nig08-A18(lin3)\_ADU56617  
 LASV\_AV(lin5)\_AO59509  
 LASV\_KAK-428(lin6)\_ANH09760  
 LASV\_BEN/2016/3488(lin7)\_QNC69562  
 LASV\_G3278-SLE-2013\_AIT17397  
 MOVV\_Acar\_YP\_516229  
 LCMV\_Armstrongr\_ASD49942  
 JUNV\_XJ13\_ACO52427  
 TACV\_NP\_694848  
 OLVV\_3229\_YP\_001649214  
 GTOV\_S-26764\_ALE15099  
 MACV\_Carvalho\_AIG51560

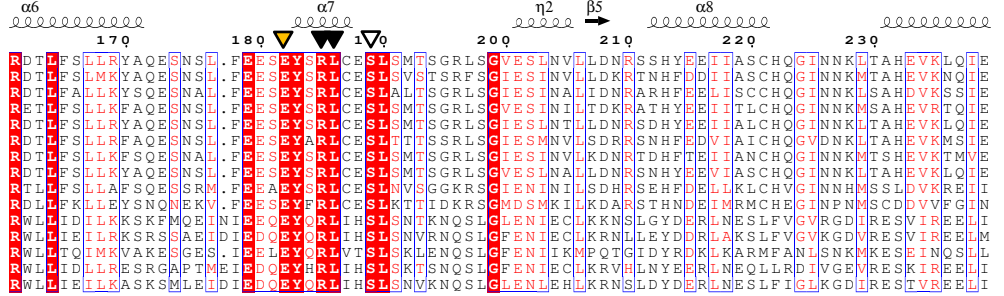

Pyramid base

LASV\_Bantou-289(lin4)\_AZI95808

LASV\_Bantou-289(lin4)\_AZI95808  
 LASV\_Pinneo-NIG-1969(lin1)\_AIT17835  
 LASV\_Nig08-04(lin2)\_ADU56613  
 LASV\_Nig08-A18(lin3)\_ADU56617  
 LASV\_AV(lin5)\_AO59509  
 LASV\_KAK-428(lin6)\_ANH09760  
 LASV\_BEN/2016/3488(lin7)\_QNC69562  
 LASV\_G3278-SLE-2013\_AIT17397  
 MOVV\_Acar\_YP\_516229  
 LCMV\_Armstrongr\_ASD49942  
 JUNV\_XJ13\_ACO52427  
 TACV\_NP\_694848  
 OLVV\_3229\_YP\_001649214  
 GTOV\_S-26764\_ALE15099  
 MACV\_Carvalho\_AIG51560

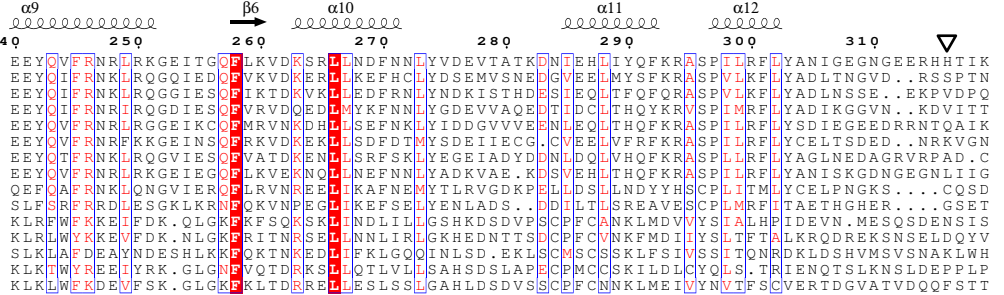

Pyramid

LASV\_Bantou-289(lin4)\_AZI95808

LASV\_Bantou-289(lin4)\_AZI95808  
 LASV\_Pinneo-NIG-1969(lin1)\_AIT17835  
 LASV\_Nig08-04(lin2)\_ADU56613  
 LASV\_Nig08-A18(lin3)\_ADU56617  
 LASV\_AV(lin5)\_AO59509  
 LASV\_KAK-428(lin6)\_ANH09760  
 LASV\_BEN/2016/3488(lin7)\_QNC69562  
 LASV\_G3278-SLE-2013\_AIT17397  
 MOVV\_Acar\_YP\_516229  
 LCMV\_Armstrongr\_ASD49942  
 JUNV\_XJ13\_ACO52427  
 TACV\_NP\_694848  
 OLVV\_3229\_YP\_001649214  
 GTOV\_S-26764\_ALE15099  
 MACV\_Carvalho\_AIG51560

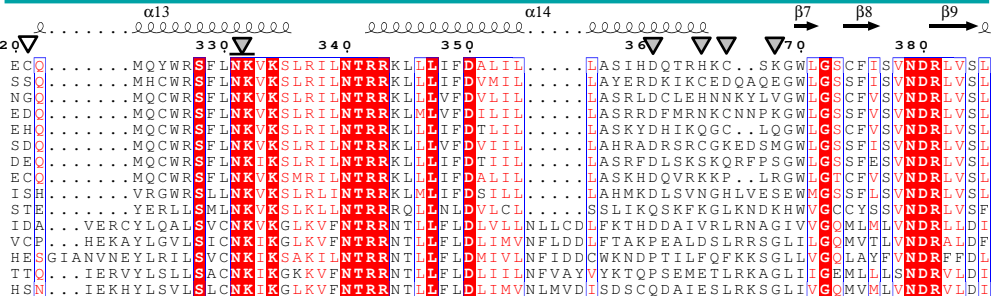

- ▼ – general defect in L protein activity upon mutation observed in Lassa virus mini-replicon system
- ▽ – selective transcriptional defect of L protein upon mutation observed in Lassa virus mini-replicon system
- ▽ – no or weak effect on L protein activity upon mutation observed in Lassa virus mini-replicon system
- ▽ – intermediate effect on L protein activity upon mutation observed in Lassa virus mini-replicon system

# Pyramid

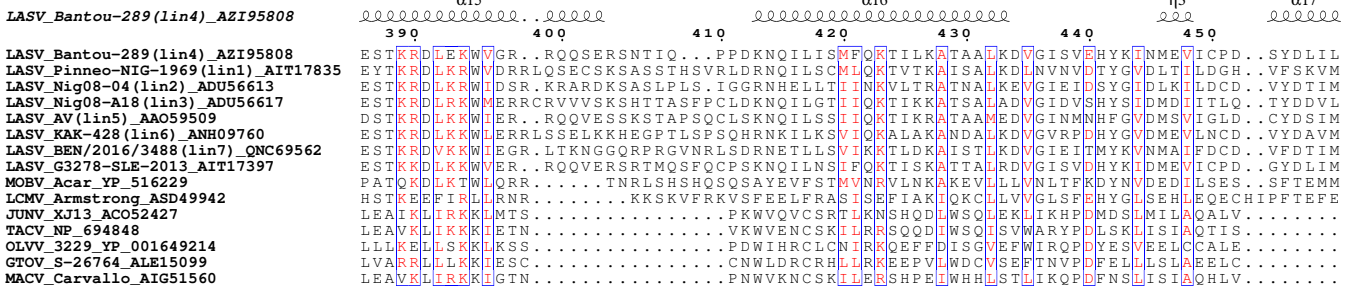

# Pyramid base

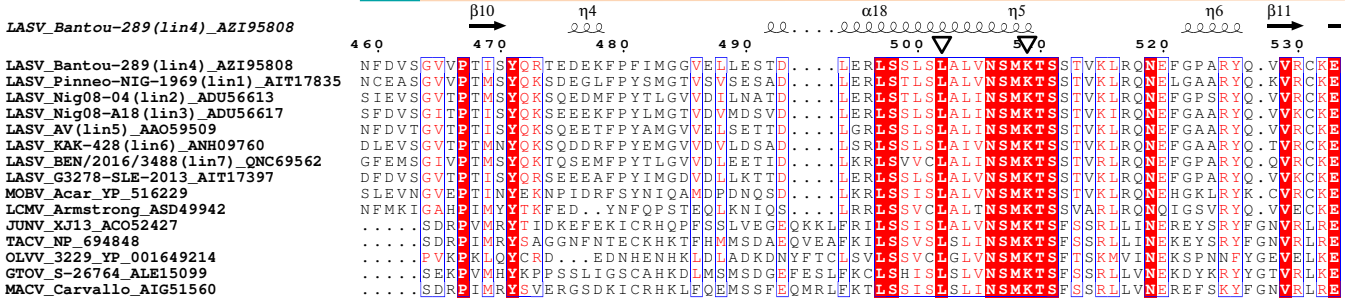

# Helical region

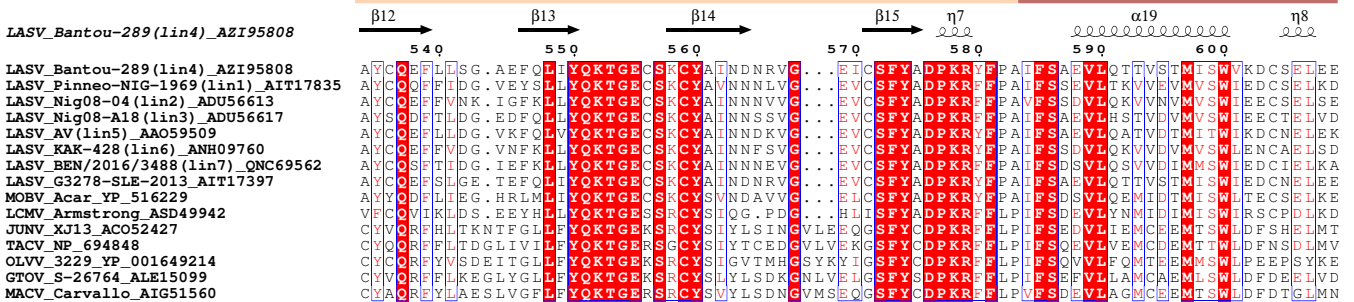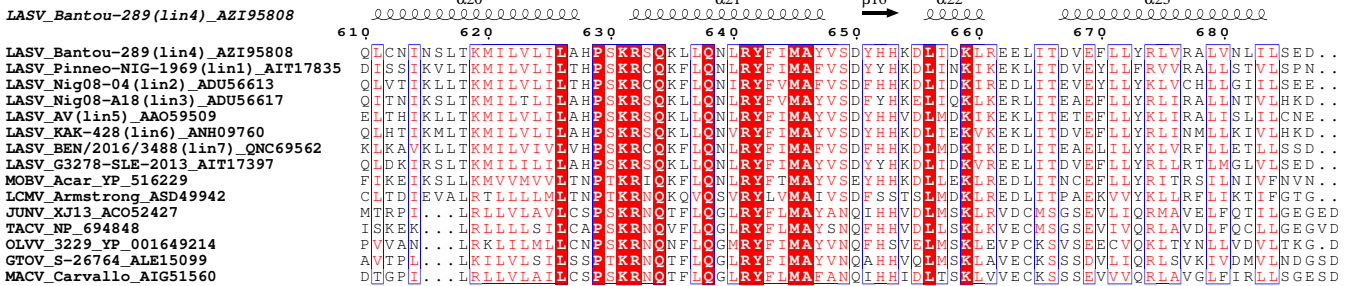

# Fingers (G)

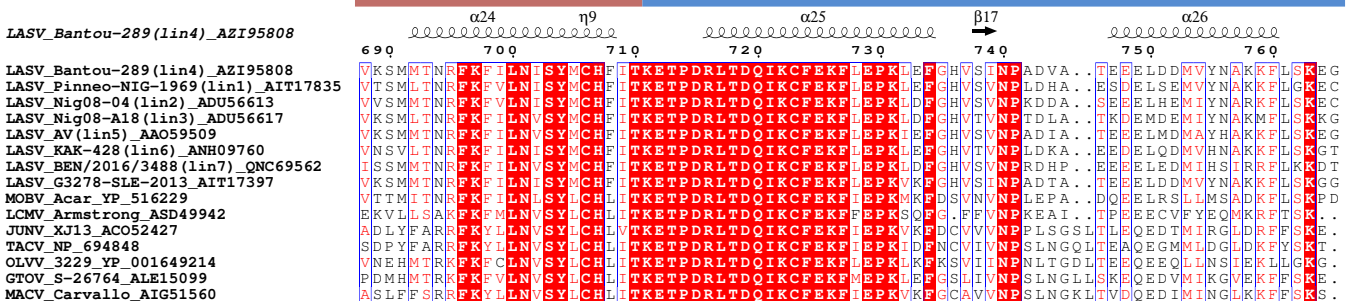

- ▼ – general defect in L protein activity upon mutation observed in Lassa virus mini-replicon system
- ▽ – selective transcriptional defect of L protein upon mutation observed in Lassa virus mini-replicon system
- ▽ – no or weak effect on L protein activity upon mutation observed in Lassa virus mini-replicon system

## Fingers

LASV\_Bantou-289 (lin4) AZI95808

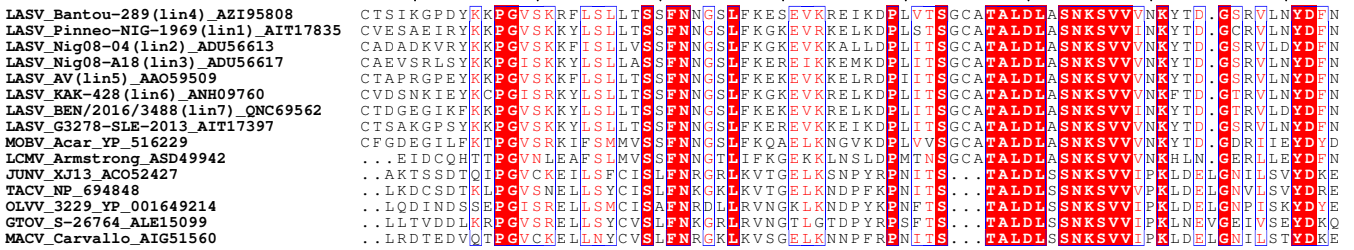

## $\alpha$ -bundle

LASV\_Bantou-289 (lin4) AZI95808

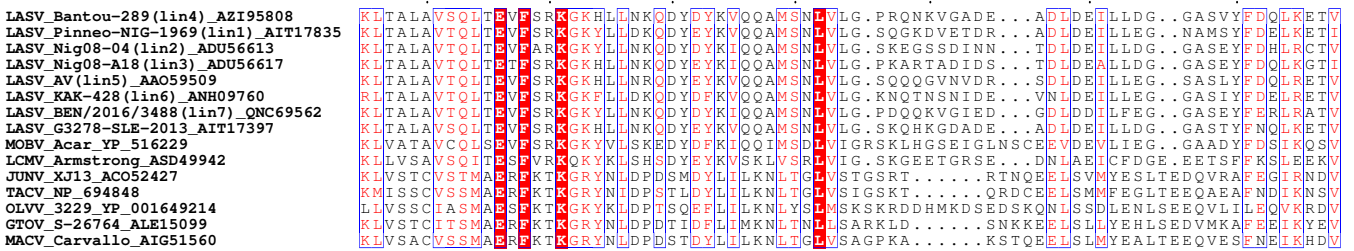

## Pendant

LASV\_Bantou-289 (lin4) AZI95808

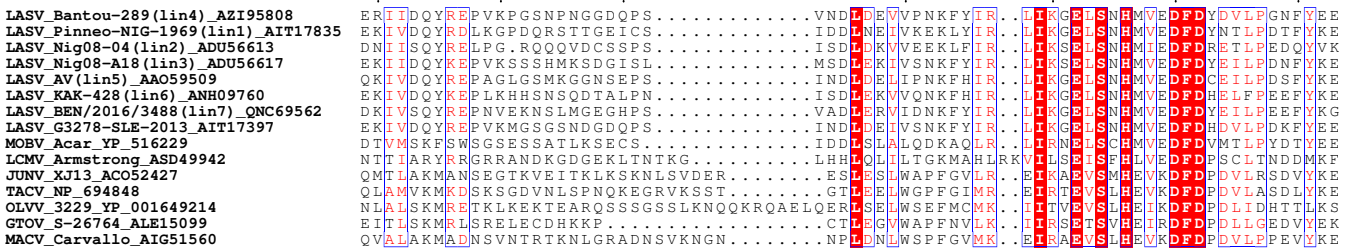

## Pendant

LASV\_Bantou-289 (lin4) AZI95808

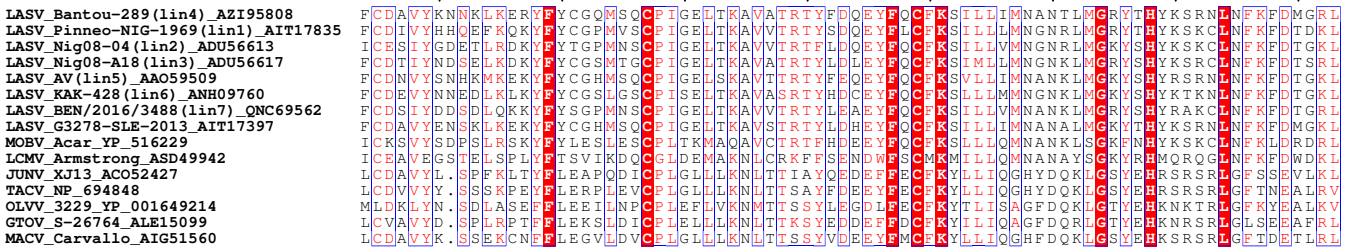

## Fingertips (F)

LASV\_Bantou-289 (lin4) AZI95808

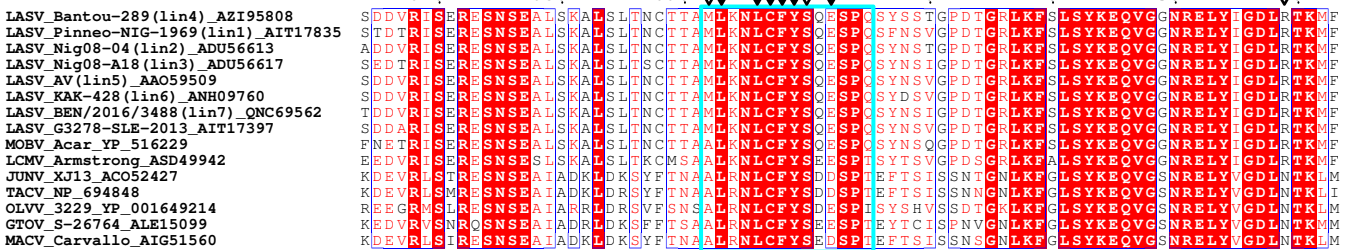

'Inhibitory peptide'  
1092-1105

- ▼ – general defect in L protein activity upon mutation observed in Lassa virus mini-replicon system
- ▽ – selective transcriptional defect of L protein upon mutation observed in Lassa virus mini-replicon system
- ∇ – no or weak effect on L protein activity upon mutation observed in Lassa virus mini-replicon system

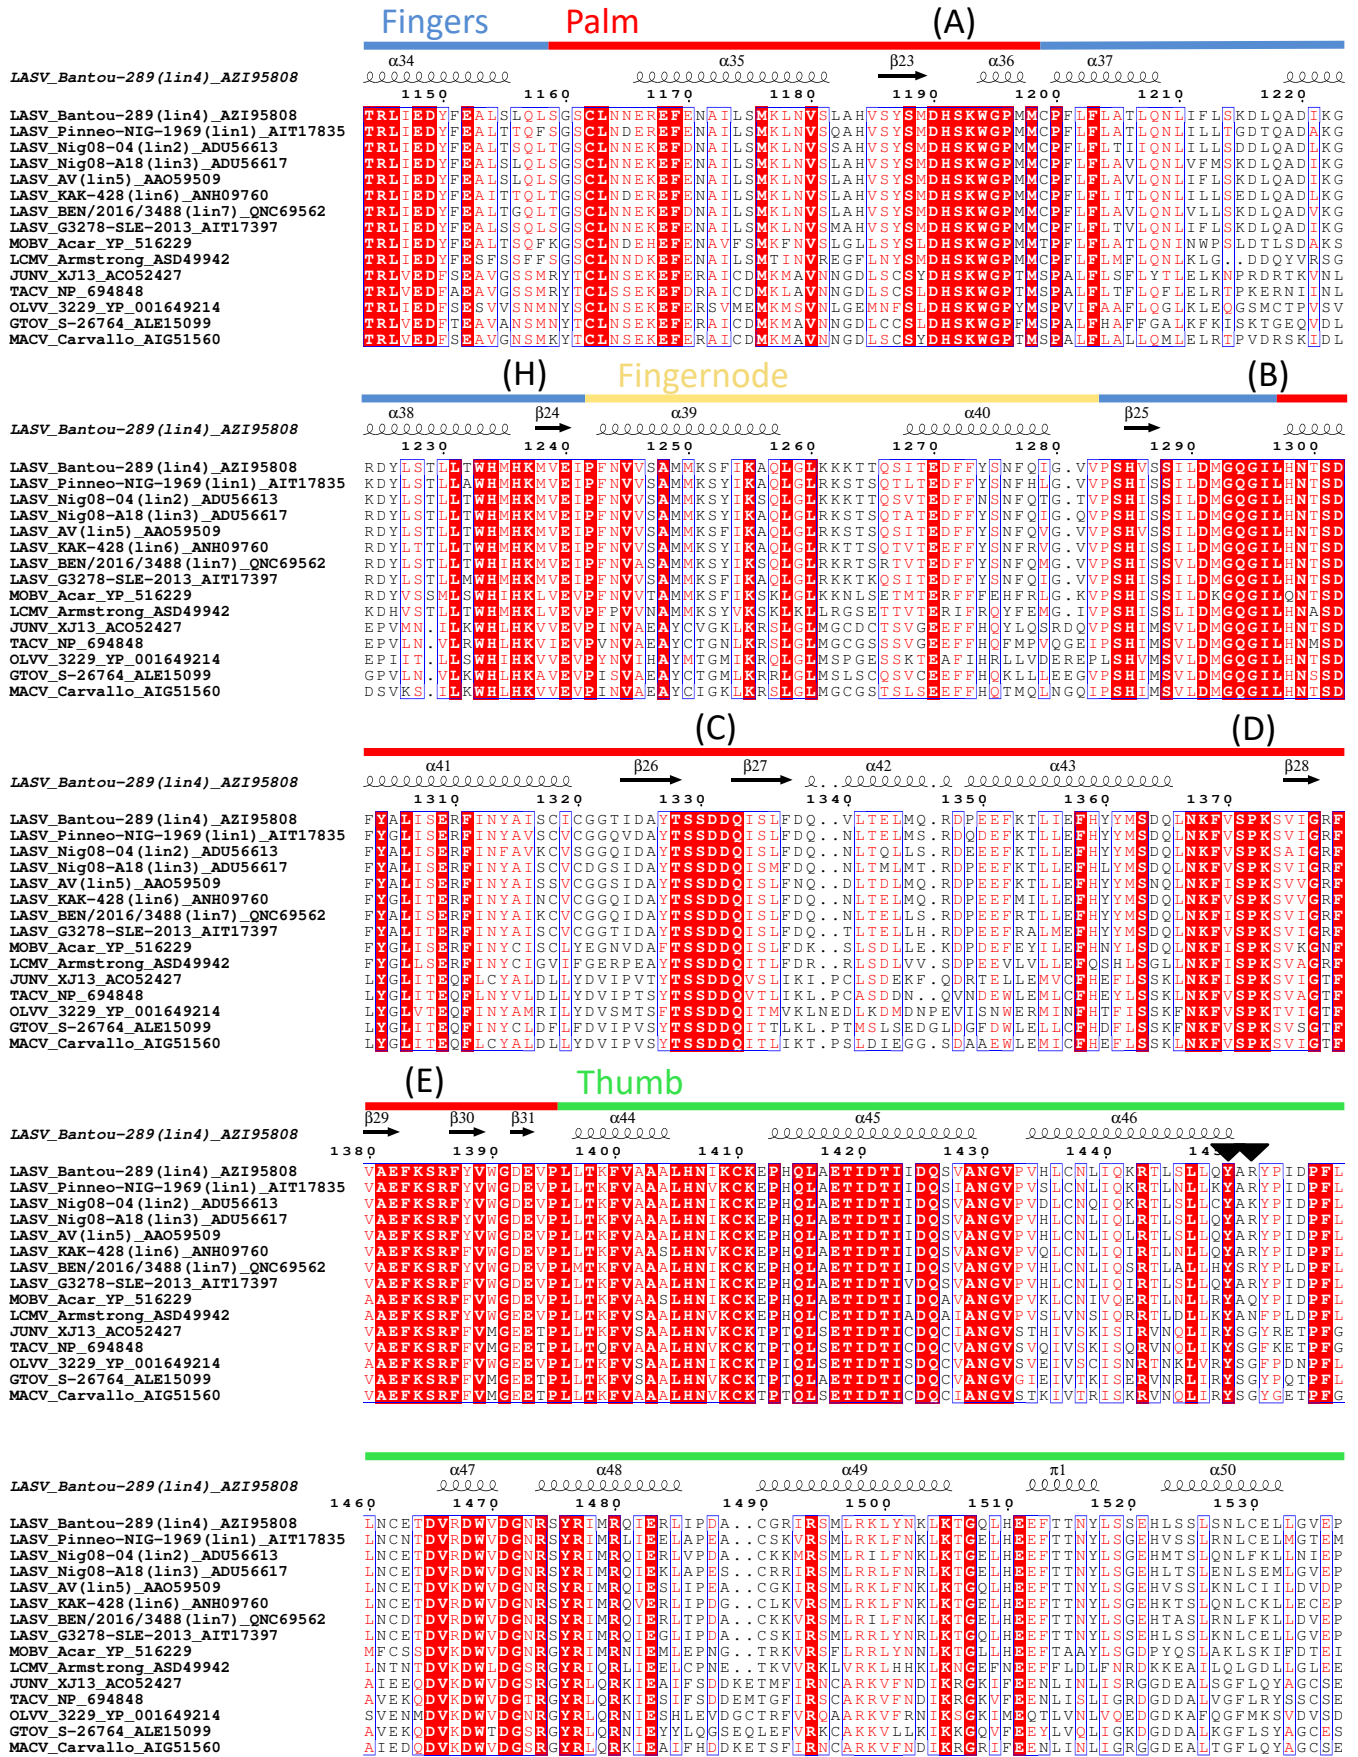

- ▼ – general defect in L protein activity upon mutation observed in Lassa virus mini-replicon system
- ▽ – selective transcriptional defect of L protein upon mutation observed in Lassa virus mini-replicon system
- ∇ – no or weak effect on L protein activity upon mutation observed in Lassa virus mini-replicon system

## Thumb

## Thumb-ring

LASV\_Bantou-289(lin4)\_AZI95808

LASV\_Bantou-289(lin4)\_AZI95808  
 LASV\_Pinneo-NIG-1969(lin1)\_AIT17835  
 LASV\_Nig08-04(lin2)\_ADU56613  
 LASV\_Nig08-A18(lin3)\_ADU56617  
 LASV\_AV(lin5)\_AO59509  
 LASV\_KAK-428(lin6)\_ANH09760  
 LASV\_BEN/2016/3488(lin7)\_QNC69562  
 LASV\_G3278-SLE-2013\_AIT17397  
 MOVV\_Acar\_YP\_516229  
 LCMV\_Armstrong\_ASD49942  
 JUNV\_XJ13\_ACO52427  
 TACV\_NP\_694848  
 OLVV\_3229\_YP\_001649214  
 GTOV\_S-26764\_ALE15099  
 MACV\_Carvalho\_AIG51560

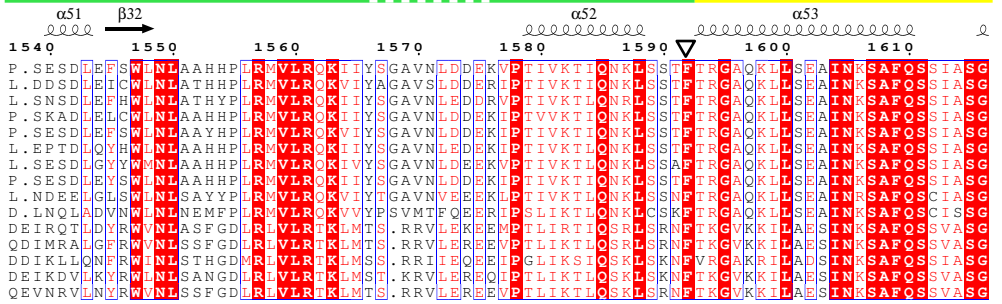

LASV\_Bantou-289(lin4)\_AZI95808

LASV\_Bantou-289(lin4)\_AZI95808  
 LASV\_Pinneo-NIG-1969(lin1)\_AIT17835  
 LASV\_Nig08-04(lin2)\_ADU56613  
 LASV\_Nig08-A18(lin3)\_ADU56617  
 LASV\_AV(lin5)\_AO59509  
 LASV\_KAK-428(lin6)\_ANH09760  
 LASV\_BEN/2016/3488(lin7)\_QNC69562  
 LASV\_G3278-SLE-2013\_AIT17397  
 MOVV\_Acar\_YP\_516229  
 LCMV\_Armstrong\_ASD49942  
 JUNV\_XJ13\_ACO52427  
 TACV\_NP\_694848  
 OLVV\_3229\_YP\_001649214  
 GTOV\_S-26764\_ALE15099  
 MACV\_Carvalho\_AIG51560

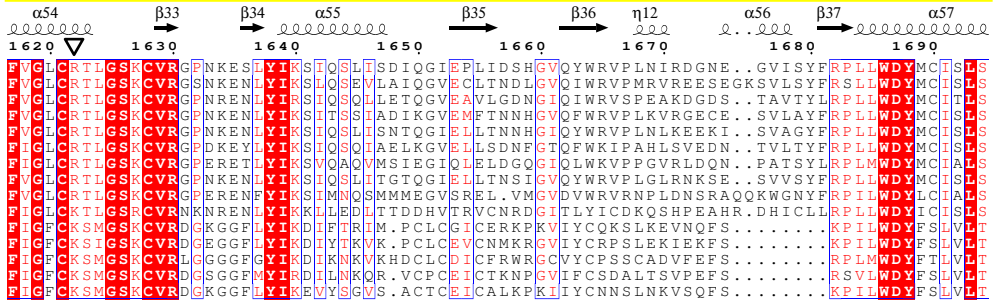

## Lid

LASV\_Bantou-289(lin4)\_AZI95808

LASV\_Bantou-289(lin4)\_AZI95808  
 LASV\_Pinneo-NIG-1969(lin1)\_AIT17835  
 LASV\_Nig08-04(lin2)\_ADU56613  
 LASV\_Nig08-A18(lin3)\_ADU56617  
 LASV\_AV(lin5)\_AO59509  
 LASV\_KAK-428(lin6)\_ANH09760  
 LASV\_BEN/2016/3488(lin7)\_QNC69562  
 LASV\_G3278-SLE-2013\_AIT17397  
 MOVV\_Acar\_YP\_516229  
 LCMV\_Armstrong\_ASD49942  
 JUNV\_XJ13\_ACO52427  
 TACV\_NP\_694848  
 OLVV\_3229\_YP\_001649214  
 GTOV\_S-26764\_ALE15099  
 MACV\_Carvalho\_AIG51560

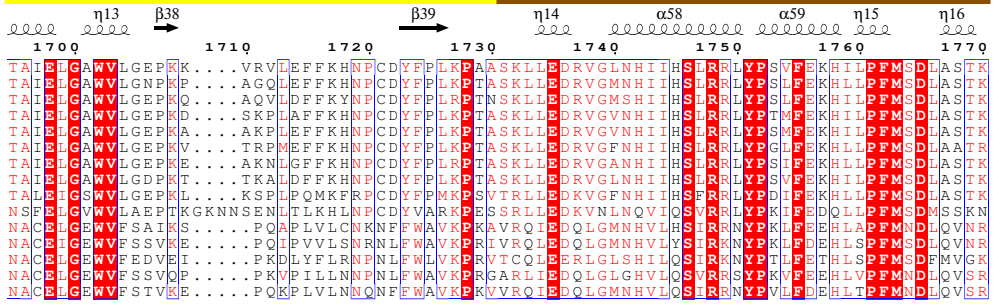

## Mid

LASV\_Bantou-289(lin4)\_AZI95808

LASV\_Bantou-289(lin4)\_AZI95808  
 LASV\_Pinneo-NIG-1969(lin1)\_AIT17835  
 LASV\_Nig08-04(lin2)\_ADU56613  
 LASV\_Nig08-A18(lin3)\_ADU56617  
 LASV\_AV(lin5)\_AO59509  
 LASV\_KAK-428(lin6)\_ANH09760  
 LASV\_BEN/2016/3488(lin7)\_QNC69562  
 LASV\_G3278-SLE-2013\_AIT17397  
 MOVV\_Acar\_YP\_516229  
 LCMV\_Armstrong\_ASD49942  
 JUNV\_XJ13\_ACO52427  
 TACV\_NP\_694848  
 OLVV\_3229\_YP\_001649214  
 GTOV\_S-26764\_ALE15099  
 MACV\_Carvalho\_AIG51560

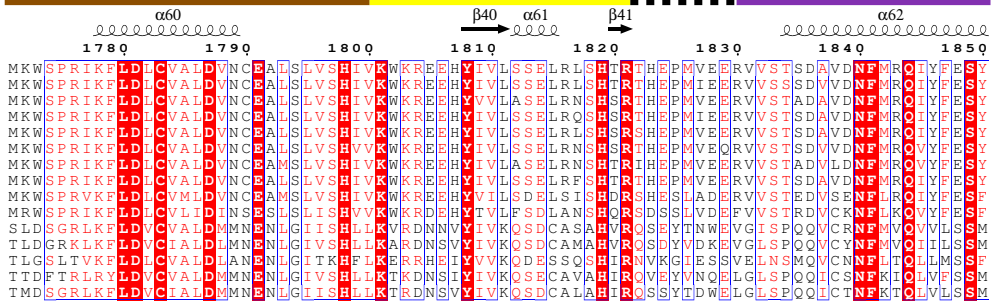

## CBD-like

LASV\_Bantou-289(lin4)\_AZI95808

LASV\_Bantou-289(lin4)\_AZI95808  
 LASV\_Pinneo-NIG-1969(lin1)\_AIT17835  
 LASV\_Nig08-04(lin2)\_ADU56613  
 LASV\_Nig08-A18(lin3)\_ADU56617  
 LASV\_AV(lin5)\_AO59509  
 LASV\_KAK-428(lin6)\_ANH09760  
 LASV\_BEN/2016/3488(lin7)\_QNC69562  
 LASV\_G3278-SLE-2013\_AIT17397  
 MOVV\_Acar\_YP\_516229  
 LCMV\_Armstrong\_ASD49942  
 JUNV\_XJ13\_ACO52427  
 TACV\_NP\_694848  
 OLVV\_3229\_YP\_001649214  
 GTOV\_S-26764\_ALE15099  
 MACV\_Carvalho\_AIG51560

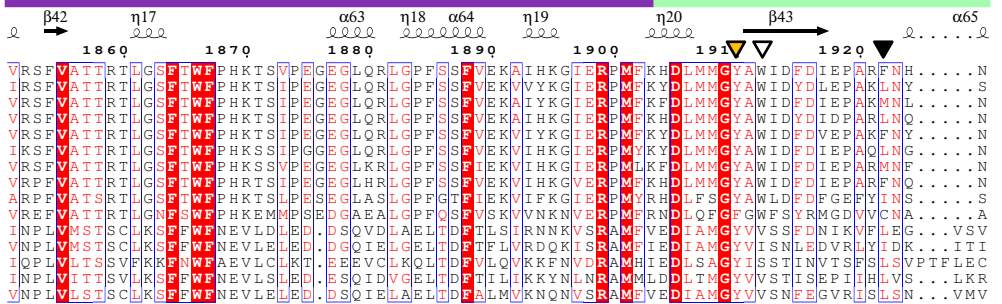

- ▼ – general defect in L protein activity upon mutation observed in Lassa virus mini-replicon system
- ▽ – selective transcriptional defect of L protein upon mutation observed in Lassa virus mini-replicon system
- ▽ – no or weak effect on L protein activity upon mutation observed in Lassa virus mini-replicon system

### CBD-like

LASV\_Bantou-289 (lin4) AZI95808

LASV\_Bantou-289 (lin4) AZI95808  
 LASV\_Pinneo-NIG-1969 (lin1) AIT17835  
 LASV\_Nig08-04 (lin2) ADU56613  
 LASV\_Nig08-A18 (lin3) ADU56617  
 LASV\_AV (lin5) AAO59509  
 LASV\_KAK-428 (lin6) ANH09760  
 LASV\_BEN/2016/3488 (lin7) QNC69562  
 LASV\_G3278-SLE-2013 AIT17397  
 MOBV\_Acar\_YP\_516229  
 LCMV\_Armstrong\_ASD49942  
 JUNV\_XJ13\_ACO52427  
 TACV\_NP\_694848  
 OLVV\_3229\_YP\_001649214  
 GTOV\_S-26764\_ALE15099  
 MACV\_Carvalho\_AIG51560

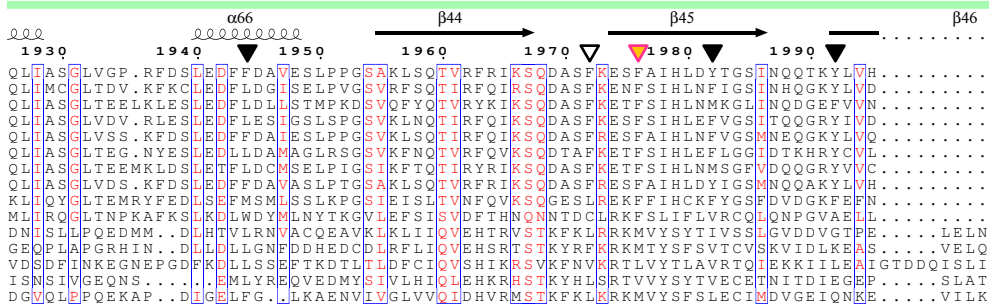

LASV\_Bantou-289 (lin4) AZI95808

LASV\_Bantou-289 (lin4) AZI95808  
 LASV\_Pinneo-NIG-1969 (lin1) AIT17835  
 LASV\_Nig08-04 (lin2) ADU56613  
 LASV\_Nig08-A18 (lin3) ADU56617  
 LASV\_AV (lin5) AAO59509  
 LASV\_KAK-428 (lin6) ANH09760  
 LASV\_BEN/2016/3488 (lin7) QNC69562  
 LASV\_G3278-SLE-2013 AIT17397  
 MOBV\_Acar\_YP\_516229  
 LCMV\_Armstrong\_ASD49942  
 JUNV\_XJ13\_ACO52427  
 TACV\_NP\_694848  
 OLVV\_3229\_YP\_001649214  
 GTOV\_S-26764\_ALE15099  
 MACV\_Carvalho\_AIG51560

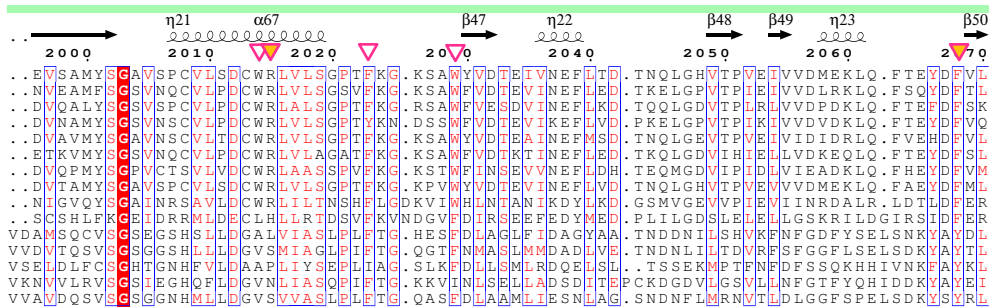

### Link 627-like

LASV\_Bantou-289 (lin4) AZI95808

LASV\_Bantou-289 (lin4) AZI95808  
 LASV\_Pinneo-NIG-1969 (lin1) AIT17835  
 LASV\_Nig08-04 (lin2) ADU56613  
 LASV\_Nig08-A18 (lin3) ADU56617  
 LASV\_AV (lin5) AAO59509  
 LASV\_KAK-428 (lin6) ANH09760  
 LASV\_BEN/2016/3488 (lin7) QNC69562  
 LASV\_G3278-SLE-2013 AIT17397  
 MOBV\_Acar\_YP\_516229  
 LCMV\_Armstrong\_ASD49942  
 JUNV\_XJ13\_ACO52427  
 TACV\_NP\_694848  
 OLVV\_3229\_YP\_001649214  
 GTOV\_S-26764\_ALE15099  
 MACV\_Carvalho\_AIG51560

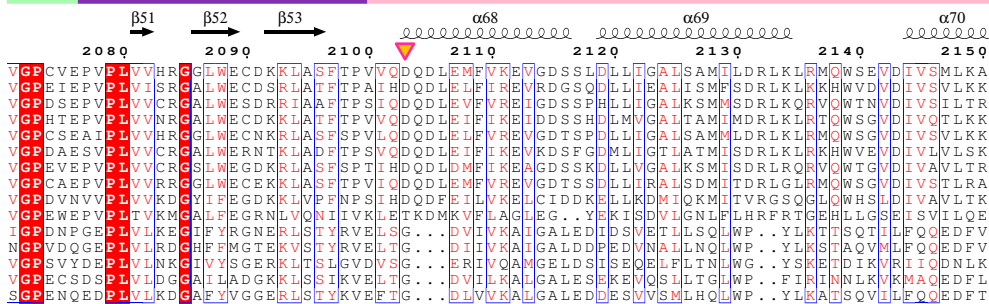

LASV\_Bantou-289 (lin4) AZI95808

LASV\_Bantou-289 (lin4) AZI95808  
 LASV\_Pinneo-NIG-1969 (lin1) AIT17835  
 LASV\_Nig08-04 (lin2) ADU56613  
 LASV\_Nig08-A18 (lin3) ADU56617  
 LASV\_AV (lin5) AAO59509  
 LASV\_KAK-428 (lin6) ANH09760  
 LASV\_BEN/2016/3488 (lin7) QNC69562  
 LASV\_G3278-SLE-2013 AIT17397  
 MOBV\_Acar\_YP\_516229  
 LCMV\_Armstrong\_ASD49942  
 JUNV\_XJ13\_ACO52427  
 TACV\_NP\_694848  
 OLVV\_3229\_YP\_001649214  
 GTOV\_S-26764\_ALE15099  
 MACV\_Carvalho\_AIG51560

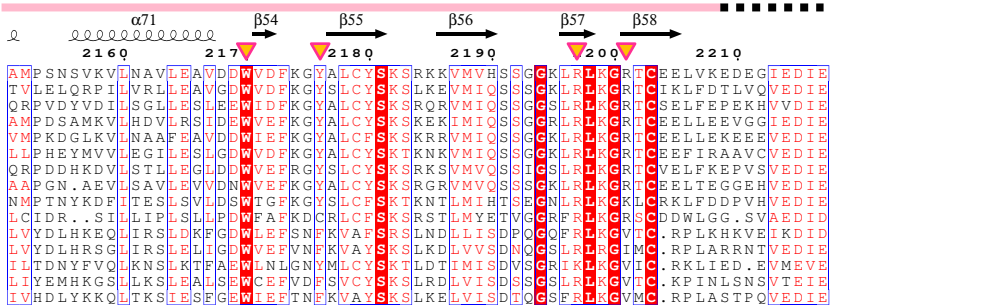

- ▼ – selective transcriptional defect of L protein upon mutation observed in Lassa virus mini-replicon system (Lehmann et al. 2014)
- ▽ – no or weak effect on L protein activity upon mutation observed in Lassa virus mini-replicon system (Lehmann et al. 2014)
- ▼ – general defect in L protein activity upon mutation observed in Lassa virus mini-replicon system
- ▼ – selective transcriptional defect of L protein upon mutation observed in Lassa virus mini-replicon system
- ▽ – no or weak effect on L protein activity upon mutation observed in Lassa virus mini-replicon system
- ▼ – intermediate effect on L protein activity upon mutation observed in Lassa virus mini-replicon system
